# Supplementary material for: Studying kinematic linkage of finger joints: estimation of kinematics of distal interphalangeal joints during manipulation
Source: PeerJ journal article supplement (doi:10.7717/peerj.14051), 2022-10-04
Supplement: 72759_Supplemental_Material_HC_Staff_File.pdf [file 72759_Supplemental_Material_HC_Staff_File.pdf]

**Supplemental Figures**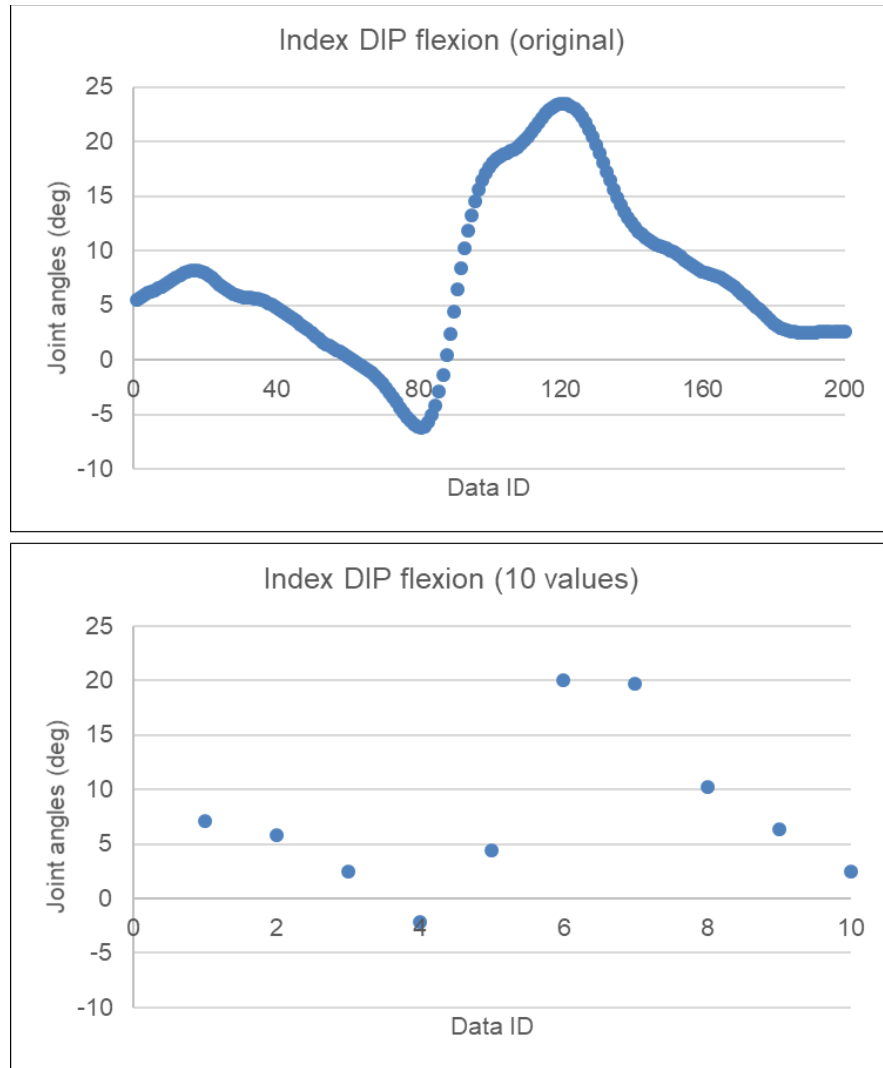

*Supp. Fig. 1: Index DIP flexion data during the manipulation phase of task 1 (picking up a coin from a flat surface, and putting it into a purse mounted on a wall). Original collected data (top) and data reduced to 10 samples (bottom).*

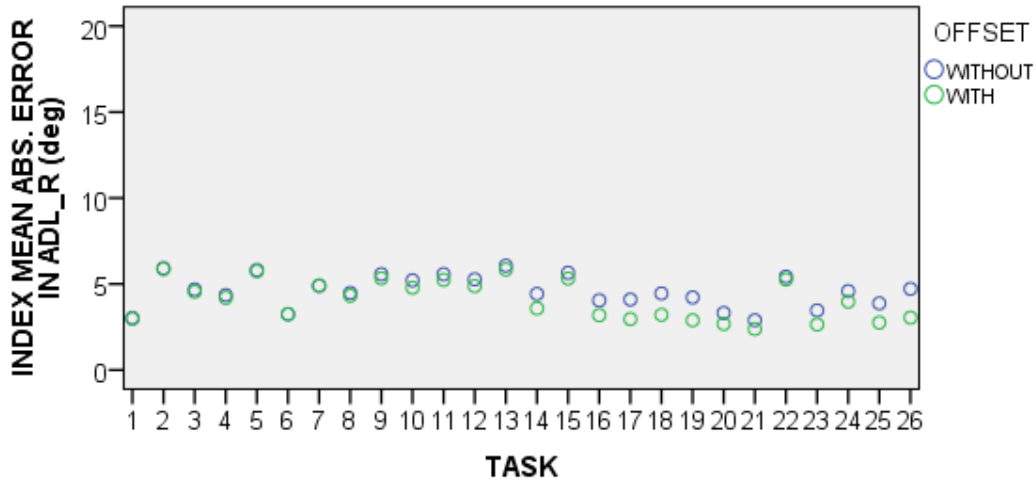

Supp. Fig. 2: Scatter plots of index finger mean absolute error (in degrees) when estimating DIP angles from PIP ones in ADL\_M using coefficients obtained when performing regressions with ADL\_R data assuming null constant coefficient (without offset) and non-null constant coefficient (with offset). Tasks #1 to #26 (ADLs performance) labeled as in Table 2.

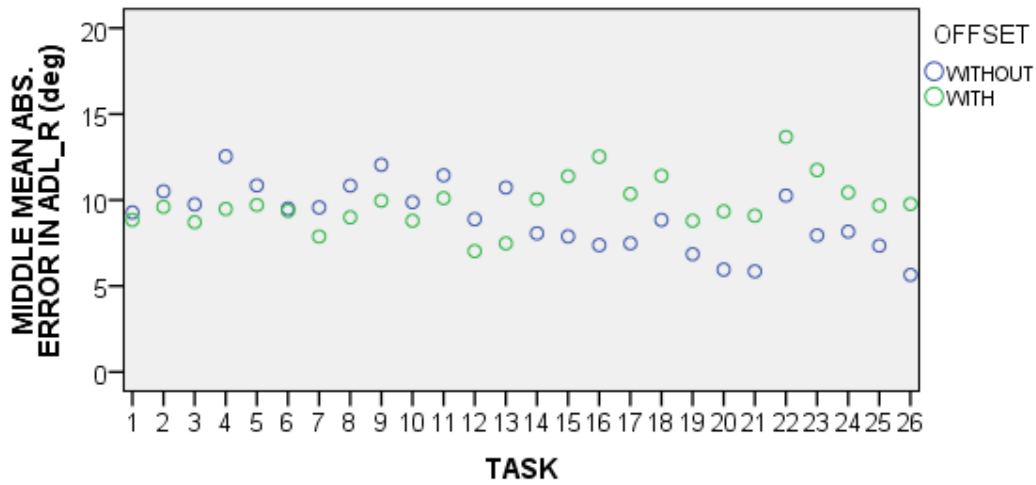

Supp. Fig. 3: Scatter plots of middle finger mean absolute error (in degrees) when estimating DIP angles from PIP ones in ADL\_M using coefficients obtained when performing regressions with ADL\_R data assuming null constant coefficient (without offset) and non-null constant coefficient (with offset). Tasks #1 to #26 (ADLs performance) labeled as in Table 2.

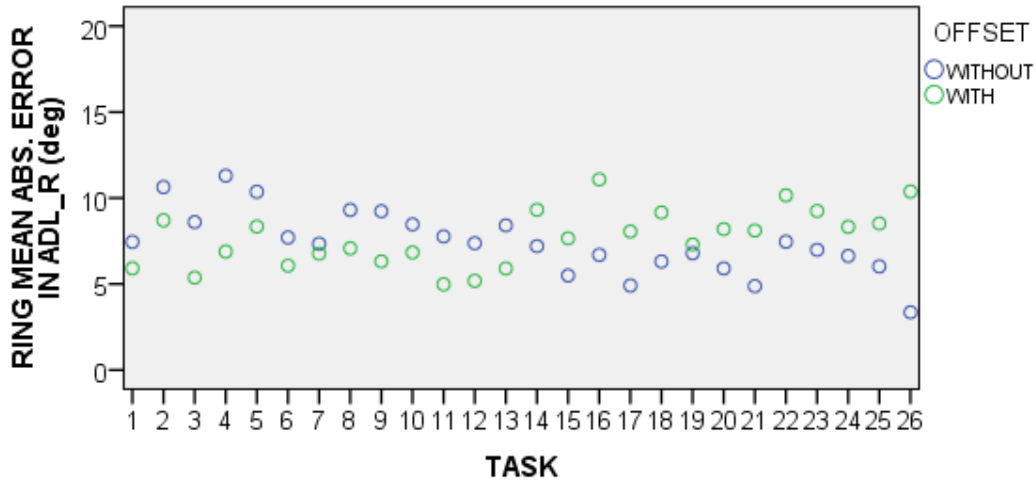

Supp. Fig. 4: Scatter plots of ring finger mean absolute error (in degrees) when estimating DIP angles from PIP ones in ADL\_M using coefficients obtained when performing regressions with ADL\_R data assuming null constant coefficient (without offset) and non-null constant coefficient (with offset). Tasks #1 to #26 (ADLs performance) labeled as in Table 2.

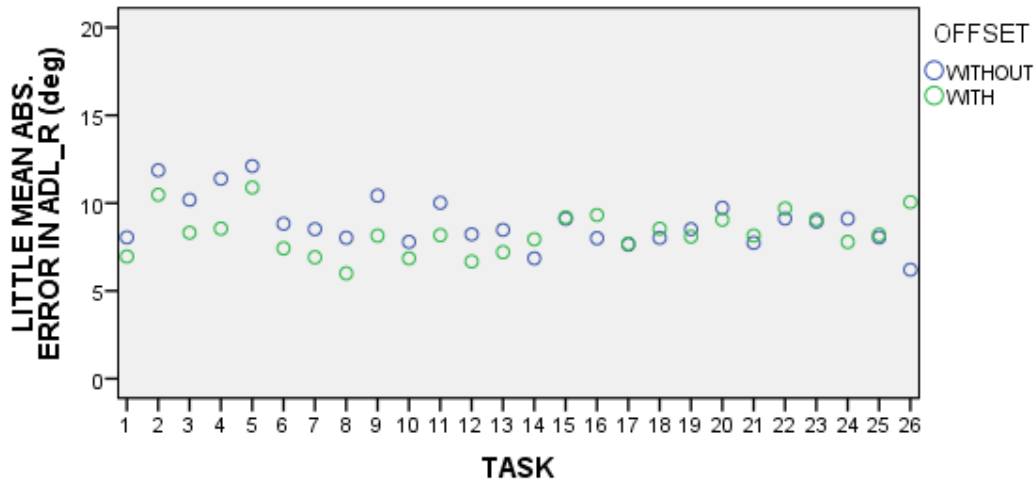

Supp. Fig. 5: Scatter plots of little finger mean absolute error (in degrees) when estimating DIP angles from PIP ones in ADL\_M using coefficients obtained when performing regressions with ADL\_R data assuming null constant coefficient (without offset) and non-null constant coefficient (with offset). Tasks #1 to #26 (ADLs performance) labeled as in Table 2.

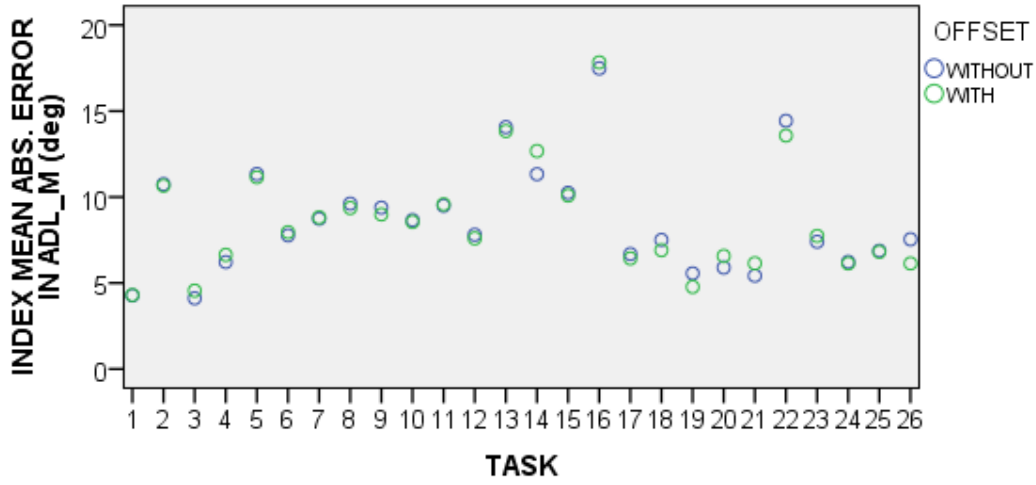

Supp. Fig. 6: Scatter plots of index finger mean absolute error (in degrees) when estimating DIP angles from PIP ones in ADL\_M using coefficients obtained when performing regressions with ADL\_M data assuming null constant coefficient (without offset) and non-null constant coefficient (with offset). Tasks #1 to #26 (ADLs performance) labeled as in Table 2.

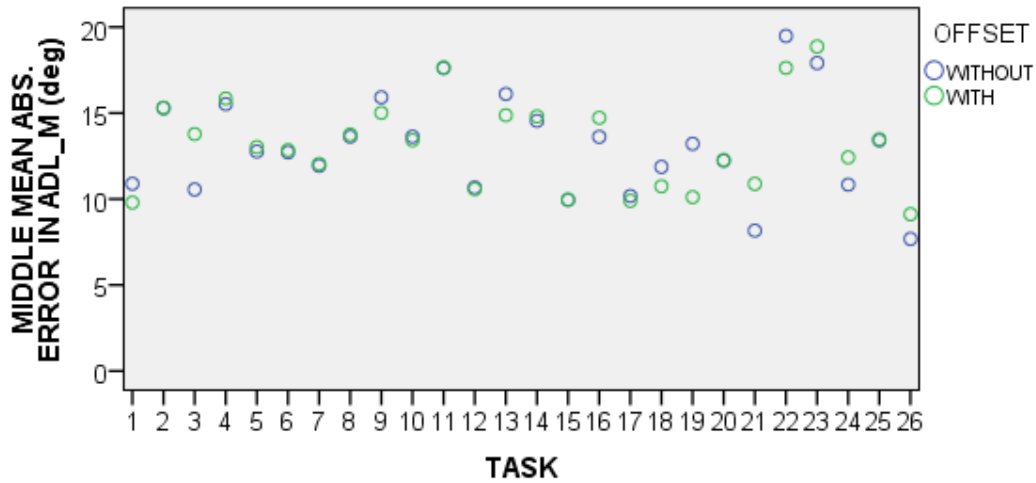

Supp. Fig. 7: Scatter plots of middle finger mean absolute error (in degrees) when estimating DIP angles from PIP ones in ADL\_M using coefficients obtained when performing regressions with ADL\_M data assuming null constant coefficient (without offset) and non-null constant coefficient (with offset). Tasks #1 to #26 (ADLs performance) labeled as in Table 2.

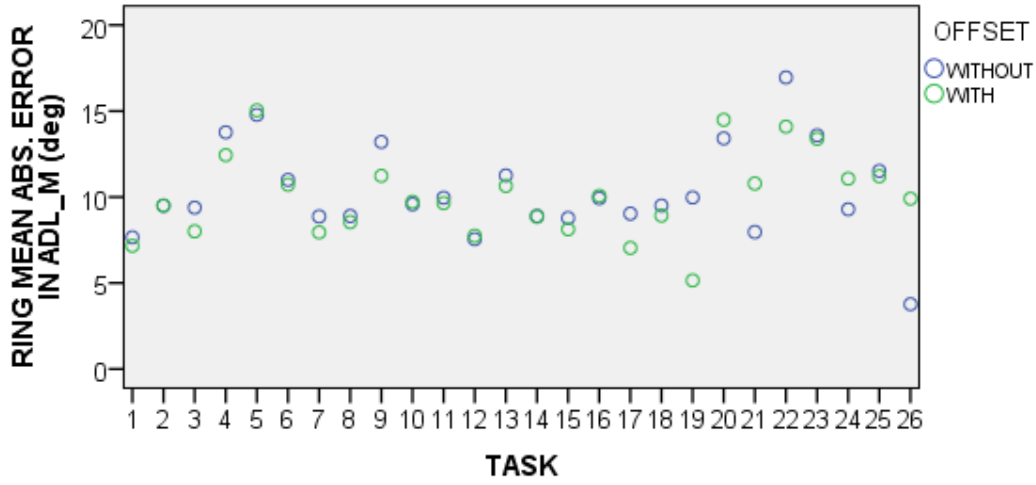

Supp. Fig. 8: Scatter plots of ring finger mean absolute error (in degrees) when estimating DIP angles from PIP ones in ADL\_M using coefficients obtained when performing regressions with ADL\_M data assuming null constant coefficient (without offset) and non-null constant coefficient (with offset). Tasks #1 to #26 (ADLs performance) labeled as in Table 2.

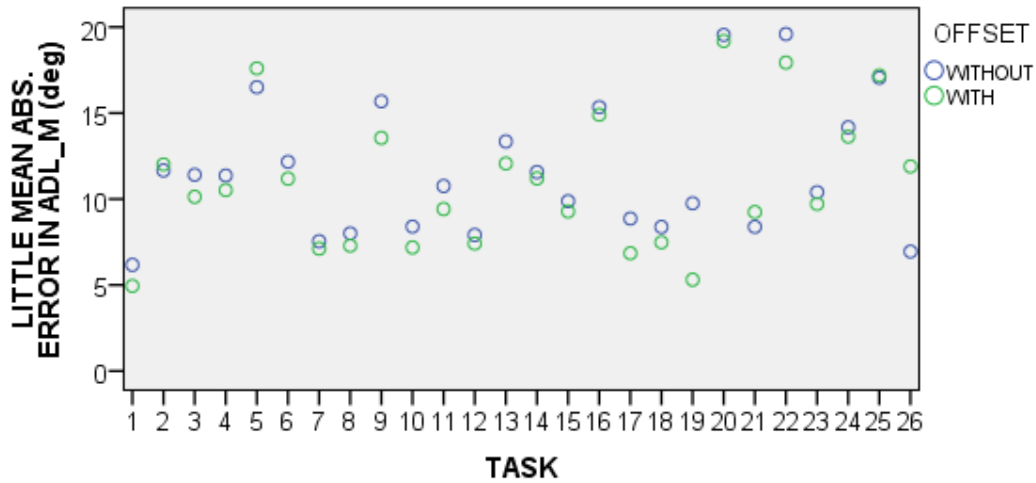

Supp. Fig. 9: Scatter plots of little finger mean absolute error (in degrees) when estimating DIP angles from PIP ones in ADL\_M using coefficients obtained when performing regressions with ADL\_M data assuming null constant coefficient (without offset) and non-null constant coefficient (with offset). Tasks #1 to #26 (ADLs performance) labeled as in Table 2.

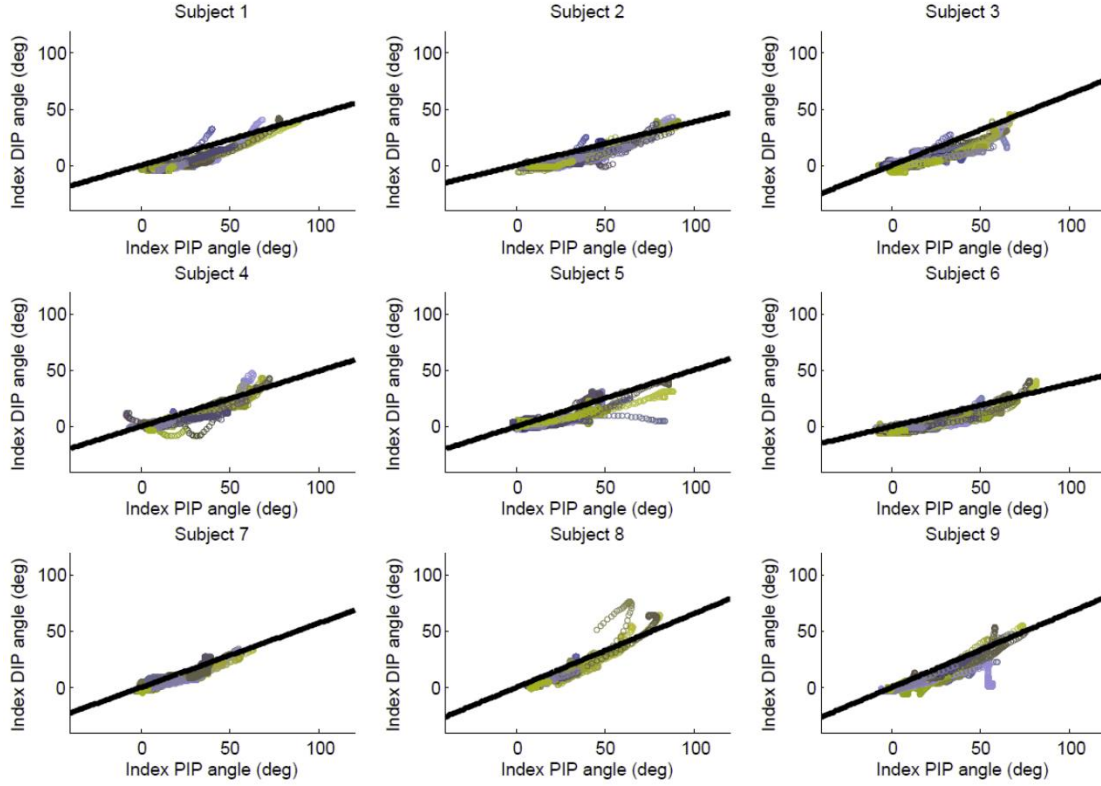

Supp. Fig. 10: Scatter plots of index finger PIP and DIP angles recorded (in degrees) during ADL\_R, for each subject. Each task data plotted with a different colour. Regression line of each subject's FMT data plotted in black.

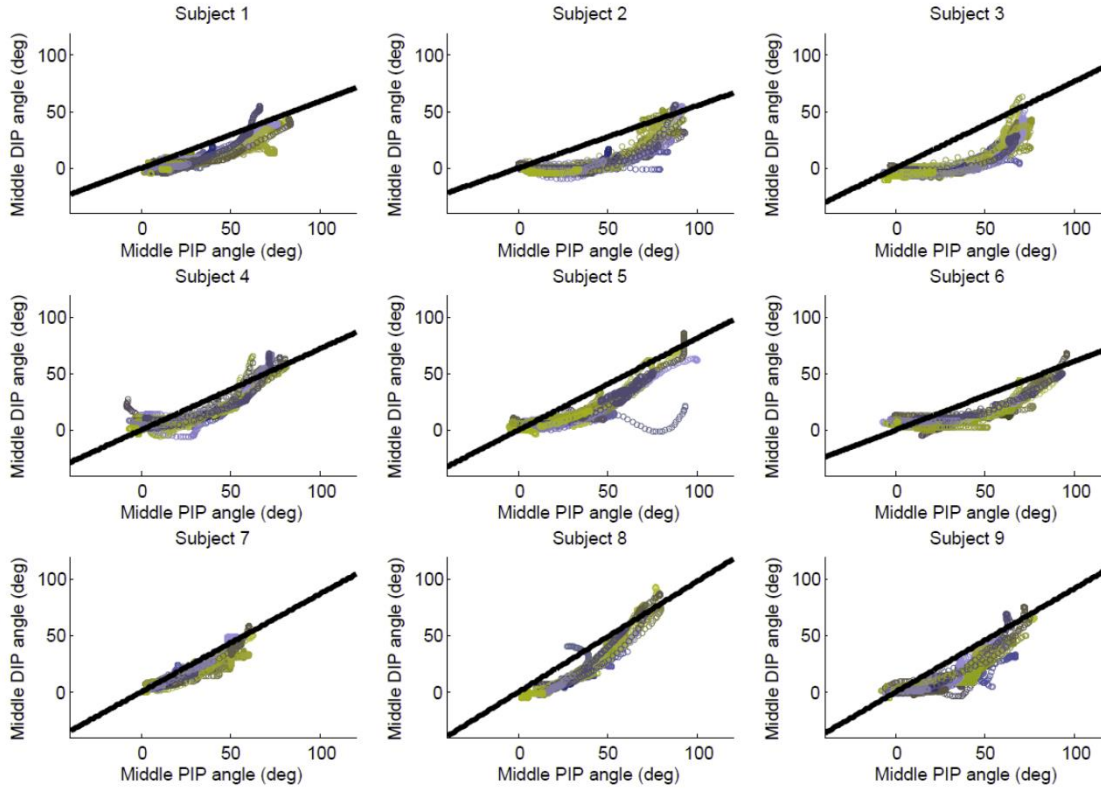

Supp. Fig. 11: Scatter plots of middle finger PIP and DIP angles recorded (in degrees) during ADL\_R, for each subject. Each task data plotted with a different colour. Regression line of each subject's FMT data plotted in black.

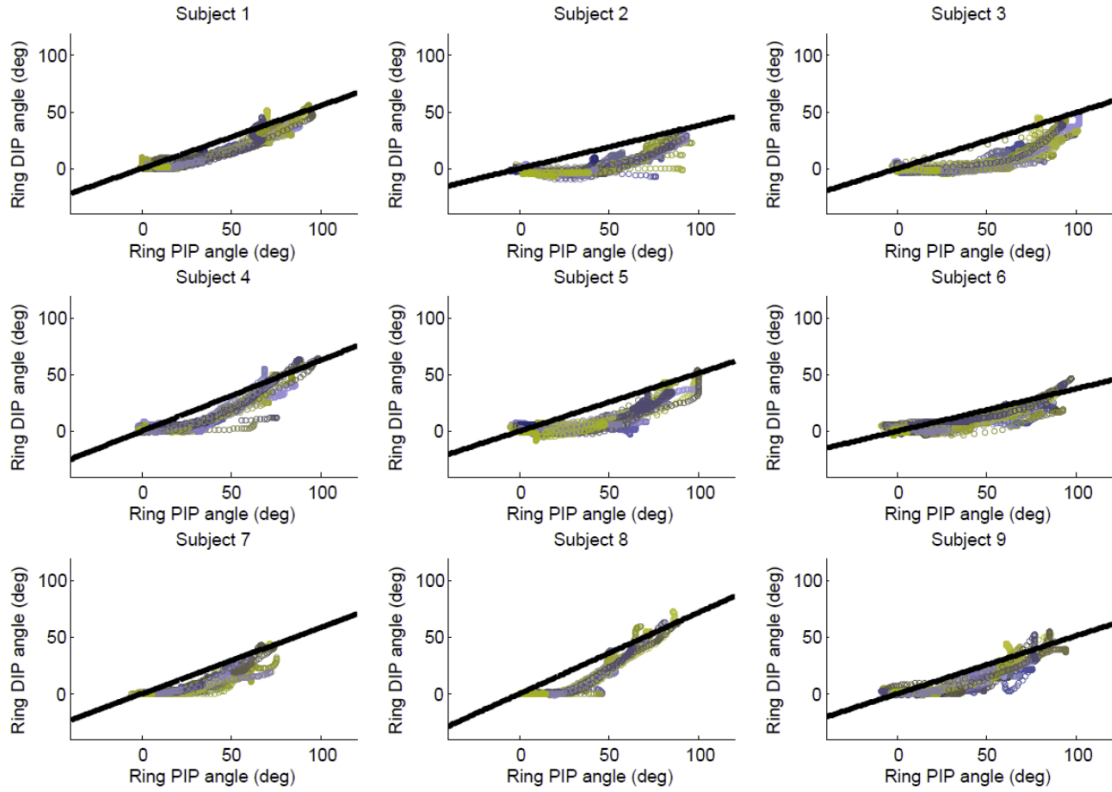

Supp. Fig. 12: Scatter plots of ring finger PIP and DIP angles recorded (in degrees) during ADL\_R, for each subject. Each task data plotted with a different colour. Regression line of each subject's FMT data plotted in black.

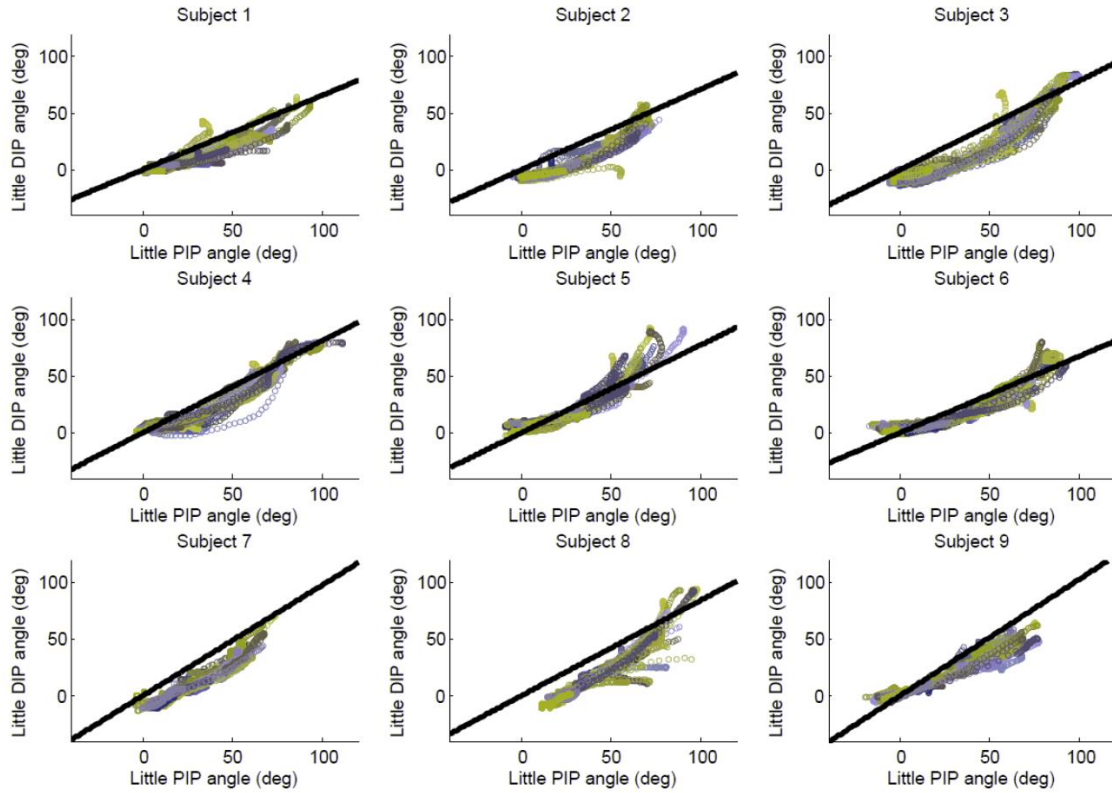

Supp. Fig. 13: Scatter plots of little finger PIP and DIP angles recorded (in degrees) during ADL\_R, for each subject. Each task data plotted with a different colour. Regression line of each subject's FMT data plotted in black.



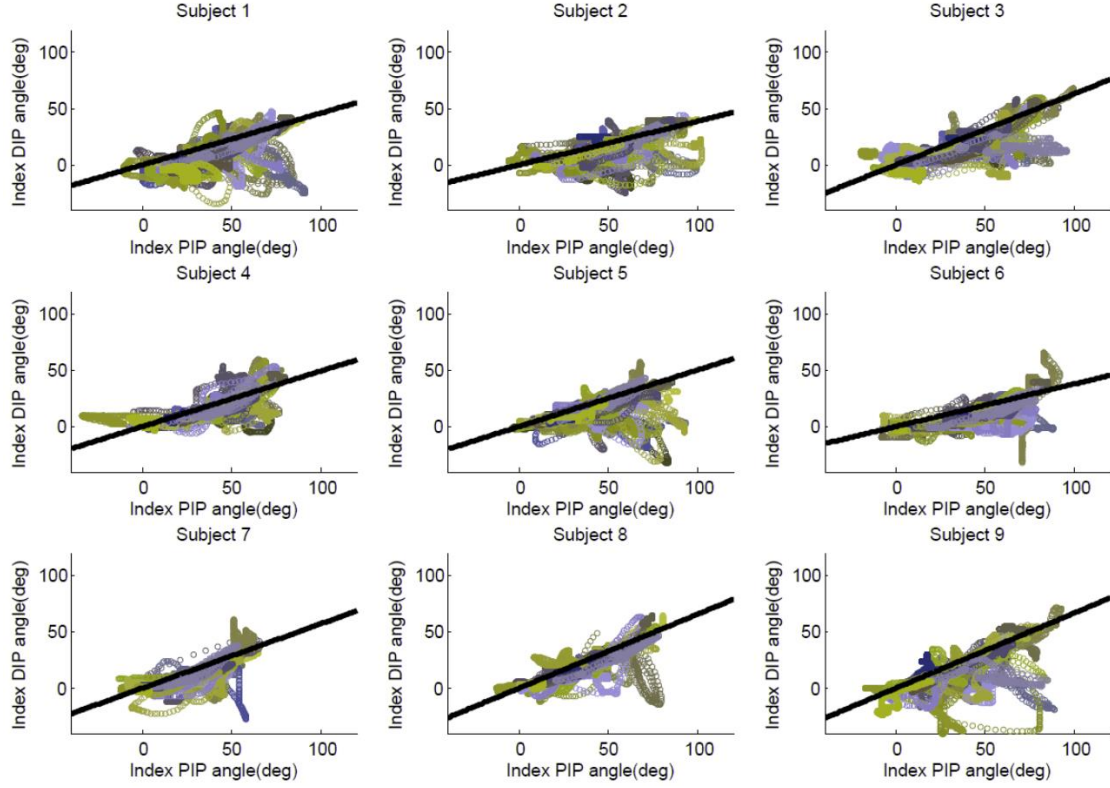

Supp. Fig. 14: Scatter plots of index finger PIP and DIP angles recorded (in degrees) during ADL\_M, for each subject. Each task data plotted with a different colour. Regression line of each subject's FMT data plotted in black.

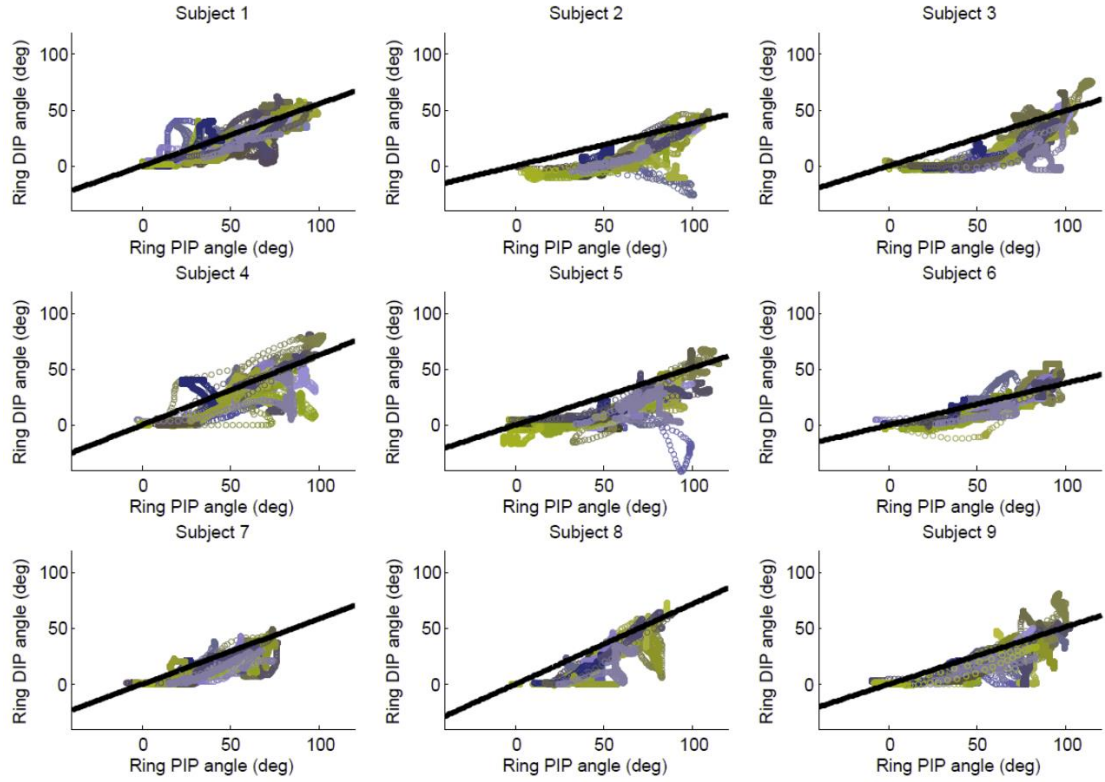

Supp. Fig. 15: Scatter plots of middle finger PIP and DIP angles recorded (in degrees) during ADL\_M, for each subject. Each task data plotted with a different colour. Regression line of each subject's FMT data plotted in black.



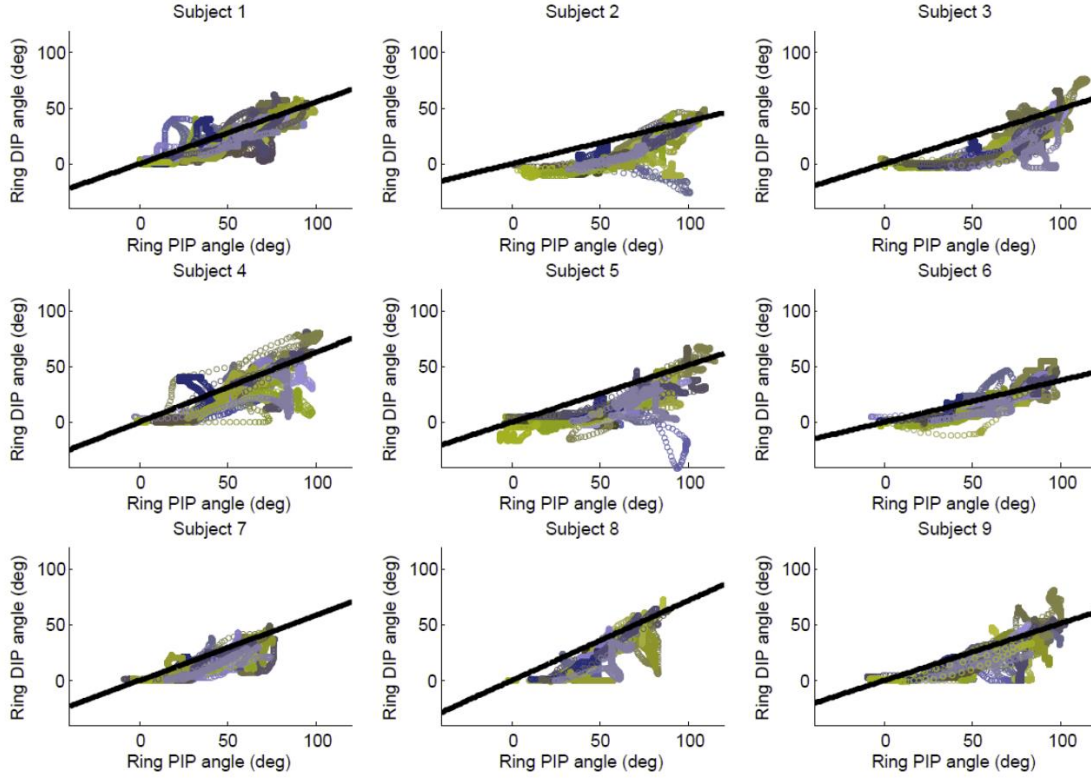

Supp. Fig. 16: Scatter plots of ring finger PIP and DIP angles recorded (in degrees) during ADL\_M, for each subject. Each task data plotted with a different colour. Regression line of each subject's FMT data plotted in black.

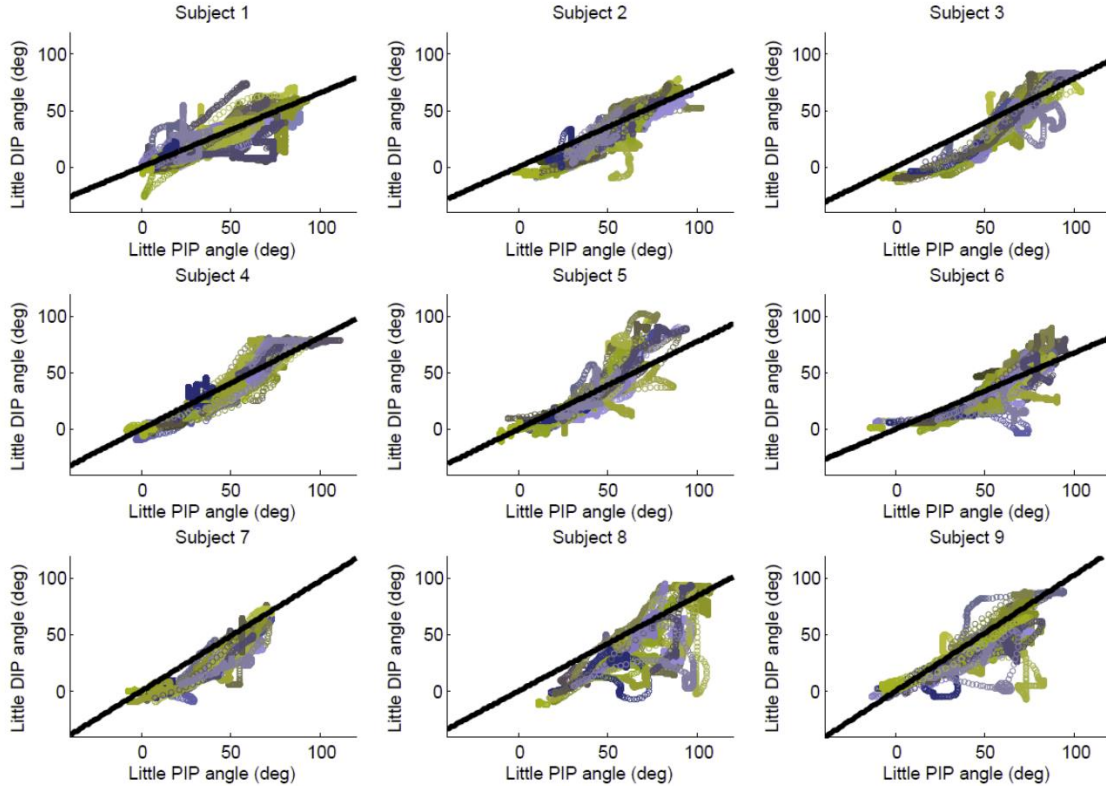

Supp. Fig. 17: Scatter plots of little finger PIP and DIP angles recorded (in degrees) during ADL\_M, for each subject. Each task data plotted with a different colour. Regression line of each subject's FMT data plotted in black.

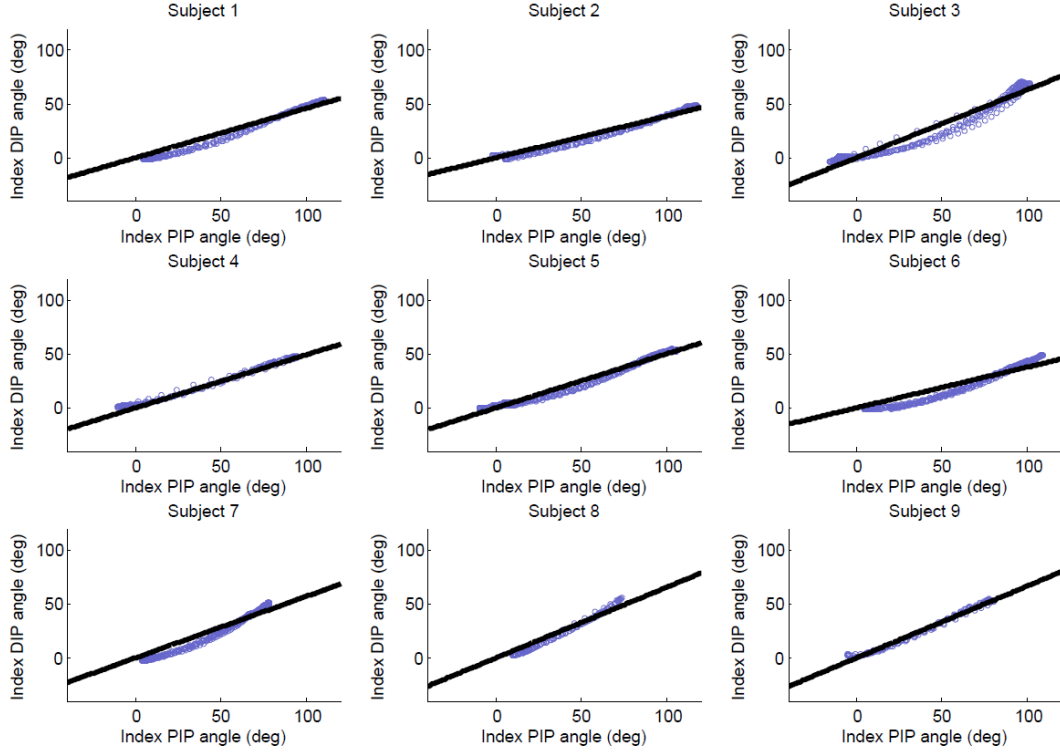

Supp. Fig. 18: Scatter plots of index finger PIP and DIP angles recorded (in degrees) during FMT, for each subject. Regression line of each subject's data plotted in black.

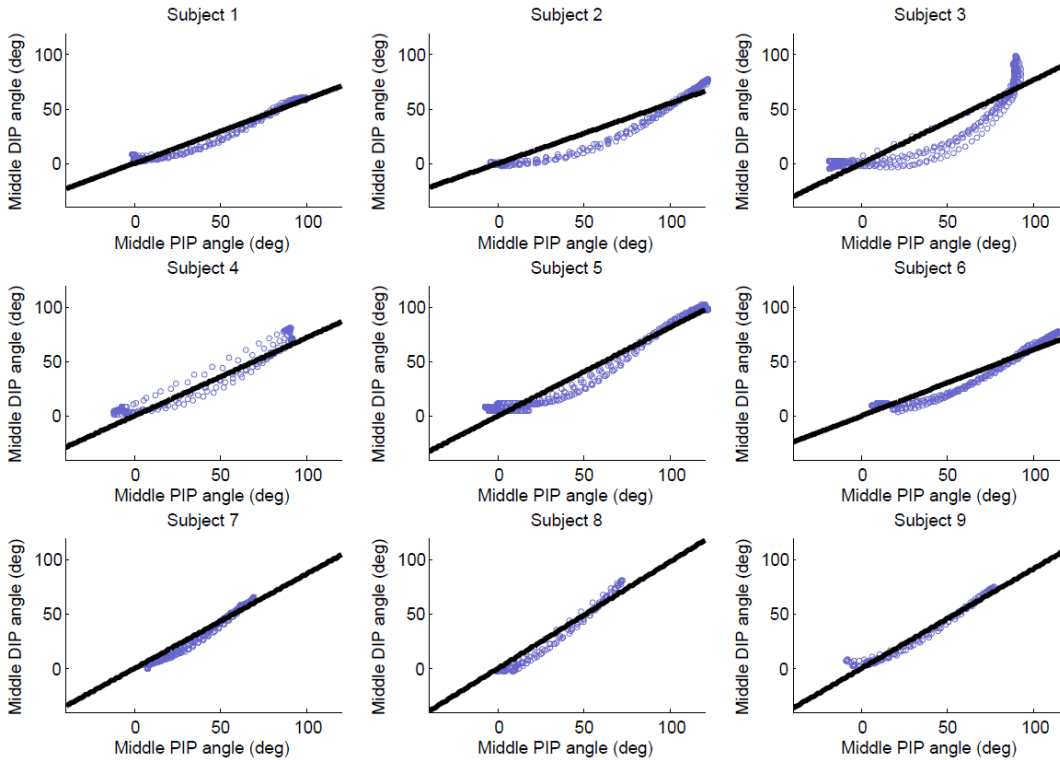

Supp. Fig. 19: Scatter plots of middle finger PIP and DIP angles recorded (in degrees) during FMT, for each subject. Regression line of each subject's data plotted in black.

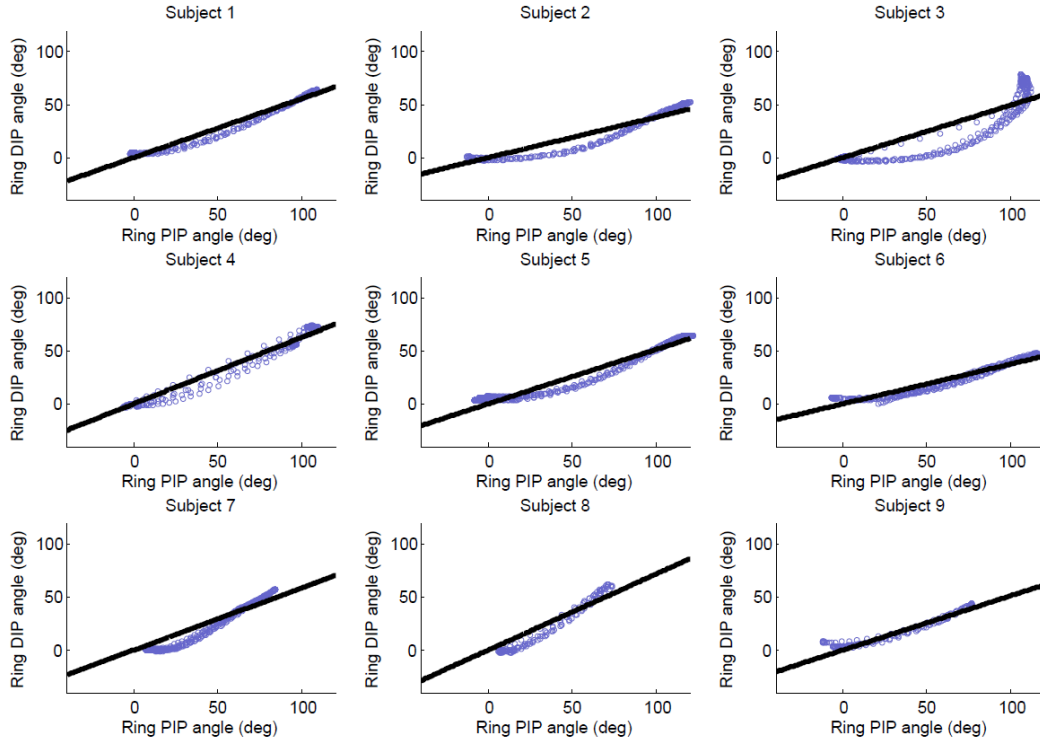

Supp. Fig. 20: Scatter plots of ring finger PIP and DIP angles recorded (in degrees) during FMT, for each subject. Regression line of each subject's data plotted in black.

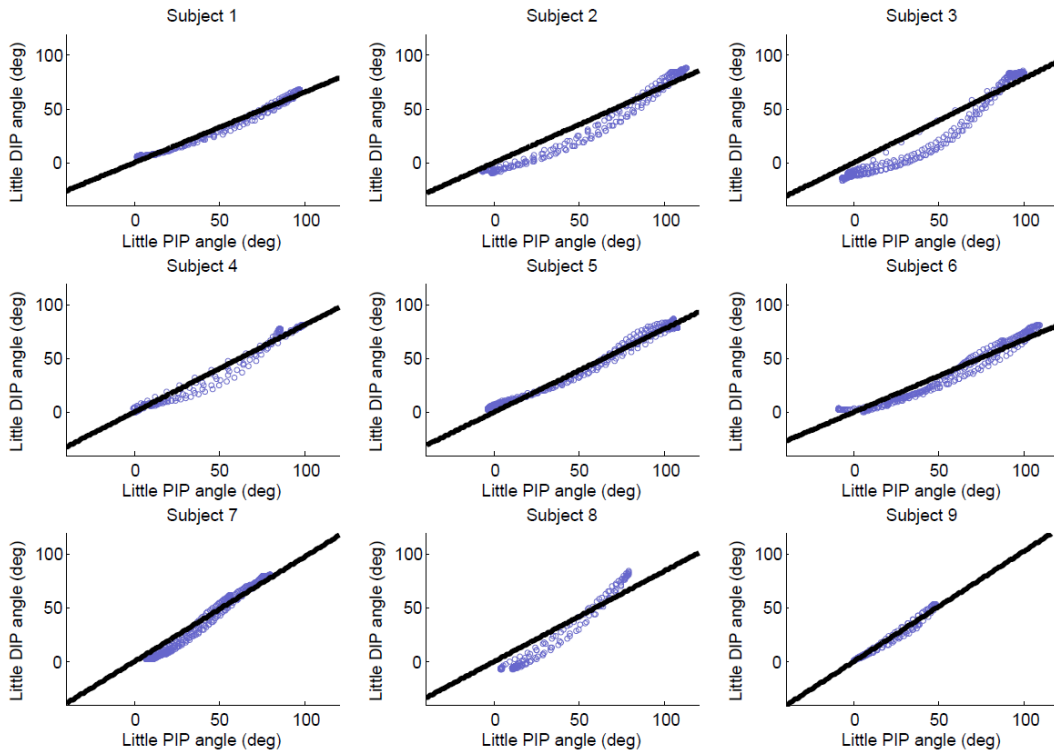

Supp. Fig. 21: Scatter plots of little finger PIP and DIP angles recorded (in degrees) during FMT, for each subject. Regression line of each subject's data plotted in black.

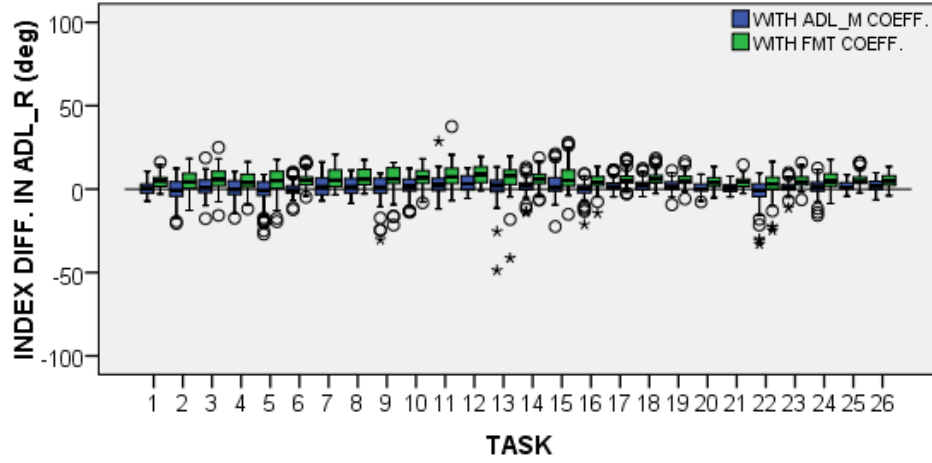

Supp. Fig. 22: Box and whiskers plots of error (in degrees) obtained in each task during ADL\_R when estimating the index DIP angle from the PIP one using the coefficients obtained during FMT (in green) and during ADL\_M (in blue). Tasks #1 to #26 (ADLs performance) labeled as in Table 2. Outliers marked with a circle, extreme outliers marked with an asterisk.

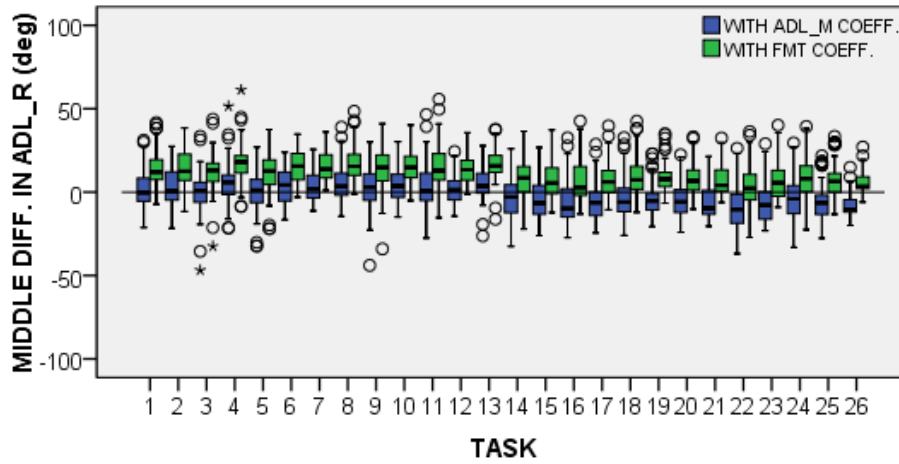

Supp. Fig. 23: Box and whiskers plots of error (in degrees) obtained in each task during ADL\_R when estimating the middle DIP angle from the PIP one using the coefficients obtained during FMT (in green) and during ADL\_M (in blue). Tasks #1 to #26 (ADLs performance) labeled as in Table 2. Outliers marked with a circle, extreme outliers marked with an asterisk.

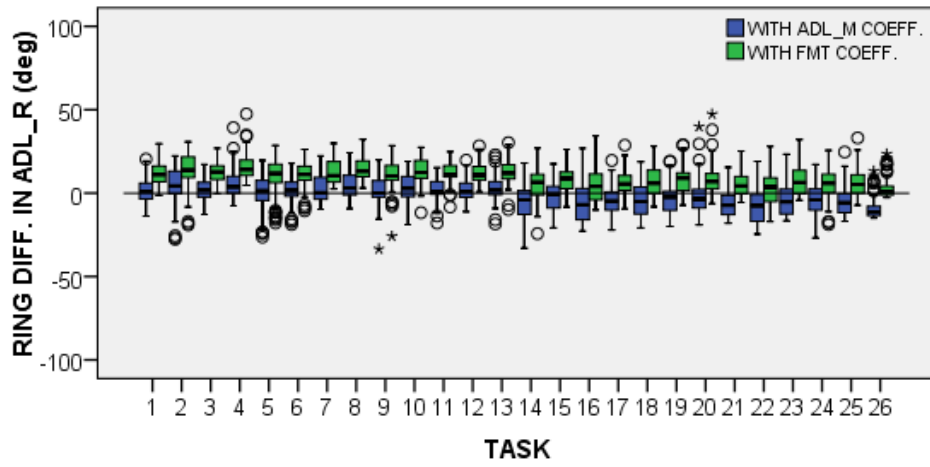

Supp. Fig. 24: Box and whiskers plots of error (in degrees) obtained in each task during ADL\_R when estimating the ring DIP angle from the PIP one using the coefficients obtained during FMT (in green) and during ADL\_M (in blue). Tasks #1 to #26 (ADLs performance) labeled as in Table 2. Outliers marked with a circle, extreme outliers marked with an asterisk.

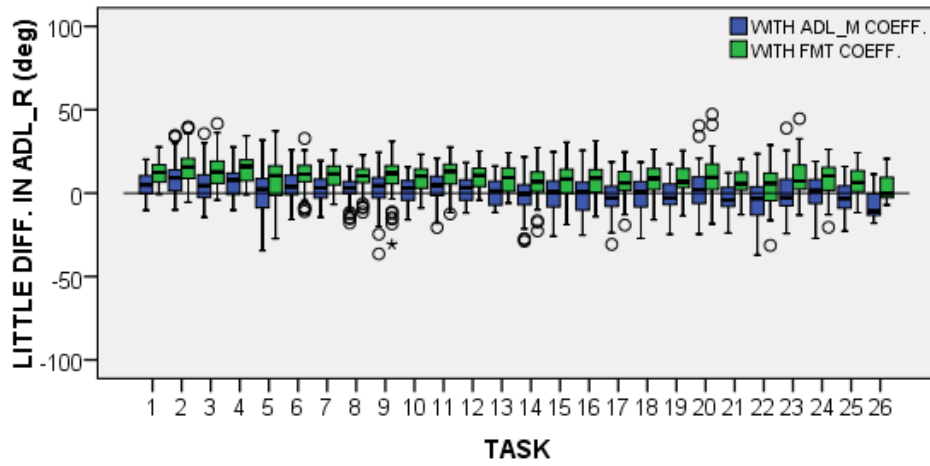

Supp. Fig. 25: Box and whiskers plots of error (in degrees) obtained in each task during ADL\_R when estimating the little DIP angle from the PIP one using the coefficients obtained during FMT (in green) and during ADL\_M (in blue). Tasks #1 to #26 (ADLs performance) labeled as in Table 2. Outliers marked with a circle, extreme outliers marked with an asterisk.

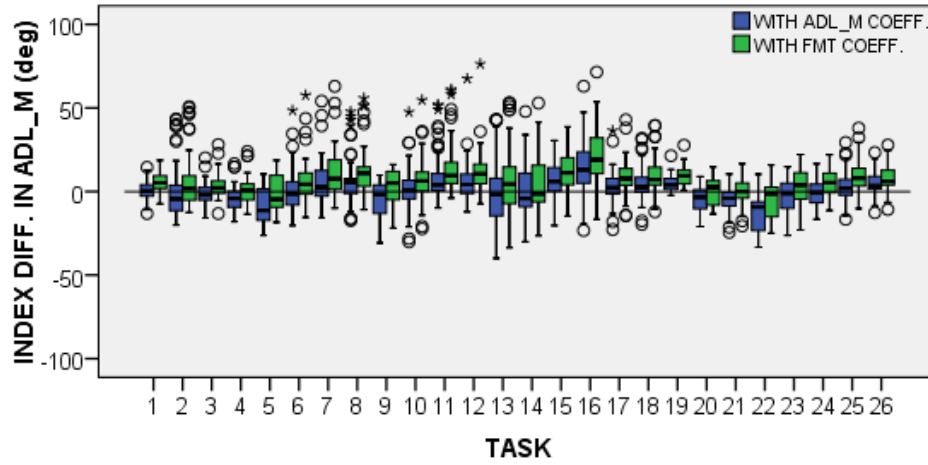

Supp. Fig. 26: Box and whiskers plots of error (in degrees) obtained in each task during ADL\_M when estimating the index DIP angle from the PIP one using the coefficients obtained during FMT (in green) and during ADL\_M (in blue). Tasks #1 to #26 (ADLs performance) labeled as in Table 2. Outliers marked with a circle, extreme outliers marked with an asterisk.

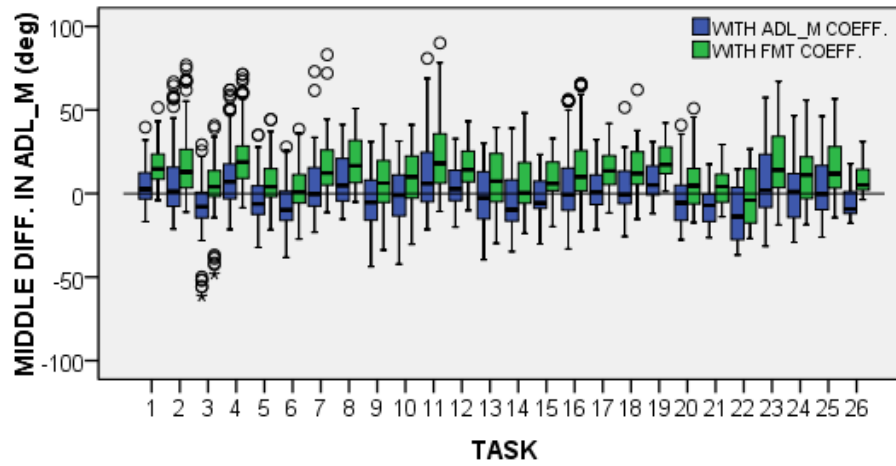

Supp. Fig. 27: Box and whiskers plots of error (in degrees) obtained in each task during ADL\_M when estimating the middle DIP angle from the PIP one using the coefficients obtained during FMT (in green) and during ADL\_M (in blue). Tasks #1 to #26 (ADLs performance) labeled as in Table 2. Outliers marked with a circle, extreme outliers marked with an asterisk.

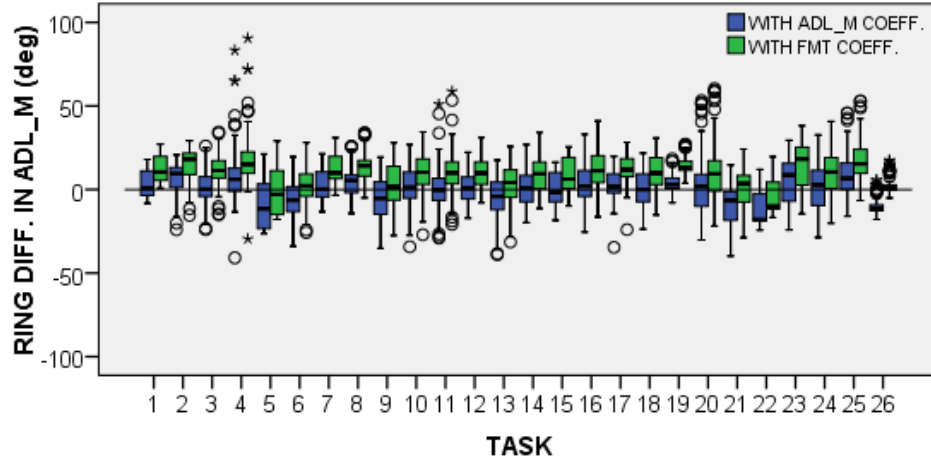

Supp. Fig. 28: Box and whiskers plots of error (in degrees) obtained in each task during ADL\_M when estimating the ring DIP angle from the PIP one using the coefficients obtained during FMT (in green) and during ADL\_M (in blue). Tasks #1 to #26 (ADLs performance) labeled as in Table 2. Outliers marked with a circle, extreme outliers marked with an asterisk.

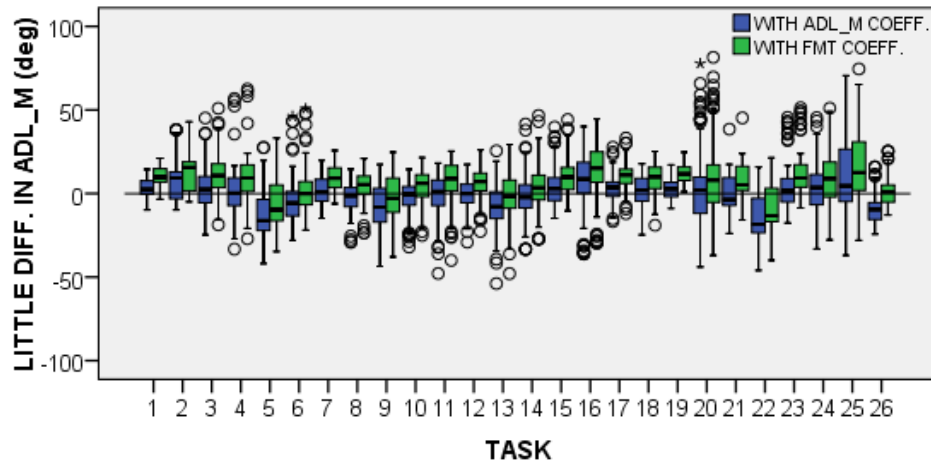

Supp. Fig. 29: Box and whiskers plots of error (in degrees) obtained in each task during ADL\_M when estimating the little DIP angle from the PIP one using the coefficients obtained during FMT (in green) and during ADL\_M (in blue). Tasks #1 to #26 (ADLs performance) labeled as in Table 2. Outliers marked with a circle, extreme outliers marked with an asterisk.



## Supplemental Tables

| Task | Index |                     | Middle |                     | Ring  |                     | Little |                     |
|------|-------|---------------------|--------|---------------------|-------|---------------------|--------|---------------------|
|      | p     | Partial Eta Squared | p      | Partial Eta Squared | p     | Partial Eta Squared | p      | Partial Eta Squared |
| 1    | 0.000 | 0.361               | 0.000  | 0.268               | 0.000 | 0.519               | 0.000  | 0.529               |
| 2    | 0.093 | 0.031               | 0.000  | 0.390               | 0.000 | 0.623               | 0.000  | 0.646               |
| 3    | 0.000 | 0.294               | 0.000  | 0.274               | 0.000 | 0.721               | 0.000  | 0.490               |
| 4    | 0.001 | 0.120               | 0.000  | 0.568               | 0.000 | 0.908               | 0.000  | 0.613               |
| 5    | 0.008 | 0.077               | 0.000  | 0.259               | 0.000 | 0.295               | 0.002  | 0.104               |
| 6    | 0.000 | 0.316               | 0.000  | 0.319               | 0.000 | 0.632               | 0.000  | 0.587               |
| 7    | 0.000 | 0.226               | 0.000  | 0.633               | 0.000 | 0.583               | 0.000  | 0.321               |
| 8    | 0.000 | 0.357               | 0.000  | 0.577               | 0.000 | 0.851               | 0.000  | 0.612               |
| 9    | 0.000 | 0.304               | 0.000  | 0.434               | 0.000 | 0.621               | 0.000  | 0.485               |
| 10   | 0.000 | 0.435               | 0.000  | 0.475               | 0.000 | 0.650               | 0.000  | 0.262               |
| 11   | 0.000 | 0.499               | 0.000  | 0.421               | 0.000 | 0.630               | 0.000  | 0.390               |
| 12   | 0.000 | 0.654               | 0.000  | 0.500               | 0.000 | 0.624               | 0.000  | 0.301               |
| 13   | 0.000 | 0.380               | 0.000  | 0.851               | 0.000 | 0.702               | 0.000  | 0.139               |
| 14   | 0.000 | 0.421               | 0.221  | 0.017               | 0.974 | 0.000               | 0.177  | 0.020               |
| 15   | 0.000 | 0.420               | 0.342  | 0.010               | 0.036 | 0.049               | 0.017  | 0.062               |
| 16   | 0.000 | 0.250               | 0.066  | 0.037               | 0.042 | 0.046               | 0.140  | 0.024               |
| 17   | 0.000 | 0.719               | 0.812  | 0.001               | 0.447 | 0.007               | 0.098  | 0.031               |
| 18   | 0.000 | 0.811               | 0.880  | 0.000               | 0.959 | 0.000               | 0.051  | 0.042               |
| 19   | 0.000 | 0.768               | 0.435  | 0.007               | 0.085 | 0.033               | 0.021  | 0.058               |
| 20   | 0.000 | 0.428               | 0.865  | 0.000               | 0.246 | 0.015               | 0.000  | 0.140               |
| 21   | 0.000 | 0.420               | 0.494  | 0.005               | 0.096 | 0.031               | 0.385  | 0.008               |
| 22   | 0.215 | 0.017               | 0.002  | 0.106               | 0.032 | 0.051               | 0.001  | 0.106               |
| 23   | 0.000 | 0.453               | 0.177  | 0.020               | 0.975 | 0.000               | 0.079  | 0.034               |
| 24   | 0.000 | 0.333               | 0.465  | 0.006               | 0.711 | 0.002               | 0.000  | 0.181               |
| 25   | 0.000 | 0.692               | 0.600  | 0.003               | 0.447 | 0.007               | 0.235  | 0.016               |
| 26   | 0.000 | 0.818               | 0.001  | 0.112               | 0.000 | 0.384               | 0.000  | 0.131               |

*Supp. Table 1: Observed p value and partial eta squared in the repeated measures ANOVAs performed with the mean error when estimating DIP angles from PIP ones in ADL\_R, classified by fingers.*

| Task | Index |                     | Middle |                     | Ring  |                     | Little |                     |
|------|-------|---------------------|--------|---------------------|-------|---------------------|--------|---------------------|
|      | p     | Partial Eta Squared | p      | Partial Eta Squared | p     | Partial Eta Squared | p      | Partial Eta Squared |
| 1    | 0.000 | 0.203               | 0.000  | 0.411               | 0.000 | 0.495               | 0.000  | 0.727               |
| 2    | 0.048 | 0.043               | 0.000  | 0.160               | 0.000 | 0.592               | 0.000  | 0.252               |
| 3    | 0.430 | 0.007               | 0.131  | 0.025               | 0.000 | 0.314               | 0.000  | 0.199               |
| 4    | 0.111 | 0.028               | 0.000  | 0.420               | 0.000 | 0.616               | 0.002  | 0.098               |
| 5    | 0.225 | 0.016               | 0.520  | 0.005               | 0.000 | 0.158               | 0.000  | 0.268               |
| 6    | 0.133 | 0.025               | 0.024  | 0.056               | 0.060 | 0.039               | 0.013  | 0.067               |
| 7    | 0.000 | 0.262               | 0.000  | 0.253               | 0.000 | 0.369               | 0.000  | 0.226               |
| 8    | 0.000 | 0.264               | 0.000  | 0.540               | 0.000 | 0.455               | 0.012  | 0.069               |
| 9    | 0.482 | 0.006               | 0.878  | 0.000               | 0.935 | 0.000               | 0.169  | 0.021               |
| 10   | 0.006 | 0.082               | 0.081  | 0.034               | 0.000 | 0.196               | 0.009  | 0.074               |
| 11   | 0.000 | 0.619               | 0.000  | 0.338               | 0.000 | 0.172               | 0.000  | 0.163               |
| 12   | 0.000 | 0.452               | 0.000  | 0.356               | 0.000 | 0.187               | 0.000  | 0.141               |
| 13   | 0.948 | 0.000               | 0.217  | 0.017               | 0.997 | 0.000               | 0.171  | 0.021               |
| 14   | 0.082 | 0.034               | 0.163  | 0.022               | 0.029 | 0.052               | 0.879  | 0.000               |
| 15   | 0.000 | 0.573               | 0.103  | 0.030               | 0.004 | 0.090               | 0.000  | 0.313               |
| 16   | 0.000 | 0.519               | 0.005  | 0.086               | 0.000 | 0.218               | 0.000  | 0.394               |
| 17   | 0.000 | 0.389               | 0.000  | 0.244               | 0.000 | 0.575               | 0.000  | 0.474               |
| 18   | 0.000 | 0.456               | 0.000  | 0.245               | 0.000 | 0.175               | 0.000  | 0.231               |
| 19   | 0.000 | 0.888               | 0.000  | 0.807               | 0.000 | 0.910               | 0.000  | 0.688               |
| 20   | 0.197 | 0.019               | 0.678  | 0.002               | 0.022 | 0.057               | 0.034  | 0.050               |
| 21   | 0.004 | 0.092               | 0.209  | 0.018               | 0.050 | 0.042               | 0.092  | 0.032               |
| 22   | 0.000 | 0.531               | 0.000  | 0.133               | 0.000 | 0.259               | 0.000  | 0.196               |
| 23   | 0.043 | 0.045               | 0.005  | 0.084               | 0.000 | 0.162               | 0.000  | 0.227               |
| 24   | 0.024 | 0.056               | 0.107  | 0.029               | 0.006 | 0.081               | 0.002  | 0.104               |
| 25   | 0.000 | 0.304               | 0.001  | 0.125               | 0.000 | 0.696               | 0.000  | 0.174               |
| 26   | 0.000 | 0.633               | 0.296  | 0.012               | 0.000 | 0.287               | 0.000  | 0.252               |

*Supp. Table 2: Observed p value and partial eta squared in the repeated measures ANOVAs performed with the mean error when estimating DIP angles from PIP ones in ADL\_M, classified by fingers.*
